# Supplementary material
Source: MDPI journal article supplement (https://www.mdpi.com/2073-4433/8/12/234)
Supplement: s1 [file s1]

## Supplementary Material

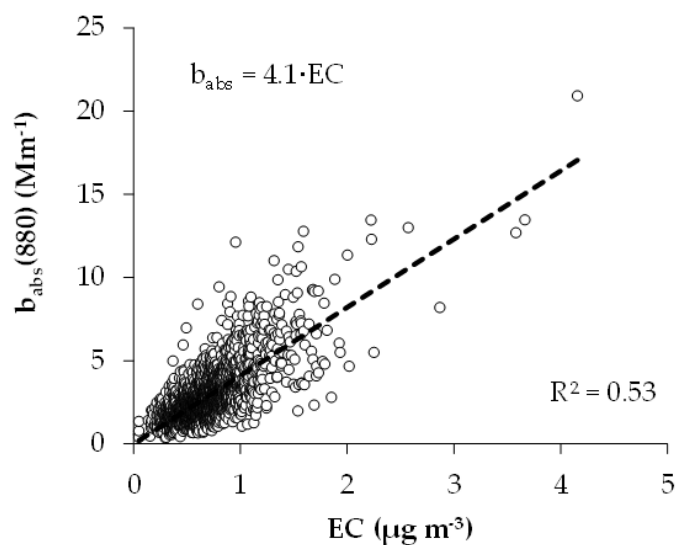

**Figure S1.** Regression of the aerosol absorption coefficients (babs) at 880 nm versus elemental carbon (EC) concentrations. The data represent 3 h averages and were collected during 03/2013 – 02/2014.

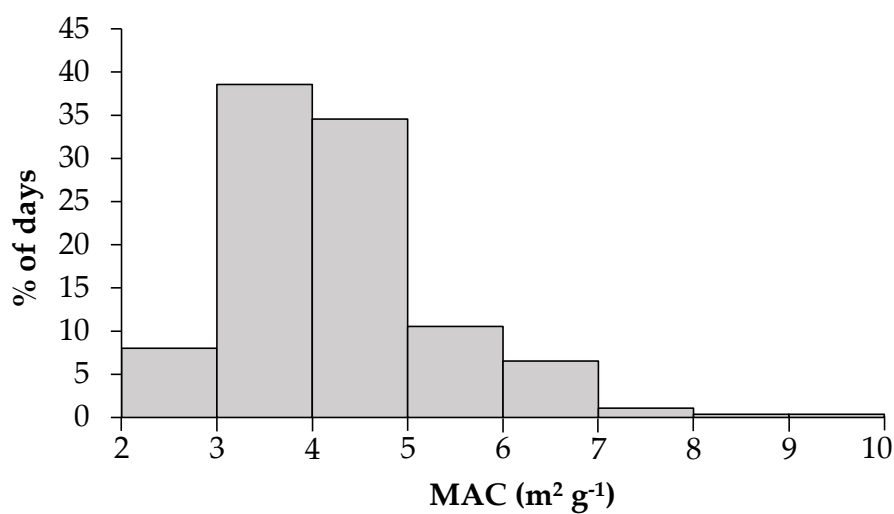

**Figure S2.** Mean 24 h values of the mass absorption cross-section (MAC), based on the ratio of the absorption coefficients (babs) at 880 nm to EC concentrations, measured during 03/2013 – 02/2014.
